# Supplementary material for: Beyond Biology: A Systematic Review of the Effects of Gender on Functional Outcomes
Source: Research Square preprint supplement (doi:10.21203/rs.3.rs-7972914/v1), 2025-11-18
Supplement: Supplementary file 2 [file d635e62235f18c5b02450577.docx]

# Supplementary File 3. Quality appraisal of included studies

## Supplementary File 3a. QUIPS Six Potential Sources of Bias and assessment criteria

| **QUIPS Six Potential Sources of Bias** | | **Assessment Criteria** | |
| --- | --- | --- | --- |
| 1. | Study Design | 1. | Was the research question or objective in this paper clearly stated? |
| 10. | Was the exposure(s) assessed more than once over time? |
| 12. | Were the outcome assessors blinded to the exposure status of participants? |
| 2. | Study Participation | 2. | Was the study population clearly specified and defined?  *Authors reported age and at least one PROGRESS Plus parameter, in addition to the exposure variable: place of residence, race/ethnicity/culture/language, occupation, religion, education, and socioeconomic status, and social capital, contextual parameters within PLUS such as disability, sexual orientation, and indigeneity.* |
| 3. | Was the participation rate of eligible persons at least 50%? |
| 4. | Were all the subjects selected or recruited from the same or similar populations (including the same time period)? Were inclusion and exclusion criteria for being in the study prespecified and applied uniformly to all participants? |
| 3. | Study Attrition | 13. | Was loss to follow-up after baseline 20% or less? |
| 4. | Associated Factors | 9. | Were the exposure measures (independent variables) clearly defined, valid, reliable, and implemented consistently across all study participants? |
| 5. | Outcome Measures/ Confounding Account | 11. | Were the outcome measures (dependent variables) clearly defined, valid, reliable, and implemented consistently across all study participants? |
| 14. | Were key potential confounding variables measured and adjusted statistically for their impact on the relationship between exposure(s) and outcome(s)? *Authors considered (at least) key potential confounding variable age.* |
| 6. | Analysis | 5. | Was a sample size justification, power description, or variance and effect estimates provided? |
| 6. | For the analyses in this paper, were the exposure(s) of interest measured prior to the outcome(s) being measured? |
| 7. | Was the timeframe sufficient so that one could reasonably expect to see an association between exposure and outcome if it existed? |
| 8. | For exposures that can vary in amount or level, did the study examine different levels of the exposure as related to the outcome (e.g., categories of exposure, or exposure measured as continuous variable)? |

## Supplementary File 3b. Summary of scoring

| **1. Crude Score** | Each Assessment Criteria was rated as yes (Y), no (N), cannot determine (CD), not reported (NR), or not applicable (NA). The crude score was calculated by dividing the number of 'yes' (Y) responses by the total number of applicable criteria. Criteria rated as not applicable (NA) were excluded from the total. |
| --- | --- |
| **2. Source of Bias Rating** | Each Source of Bias was rated as “+”, “-”, or not applicable (NA):   - **“+”** when most Assessment Criteria were rated as yes (Y) in that Source of Bias category. - **“-”** when one or more Assessment Criteria were rated as no (N) in that Source of Bias category. - **Not applicable (NA)** when all Assessment Criteria in that Source of Bias category were rated as NA. |
| **3. Overall Rating** | Finally, each study quality was summarized qualitatively into three groups:   - **Excellent (“++”)** when all or most of the Sources of Bias were rated as “+”. Studies that had more than one Assessment Criteria rated as not reported (NR) or cannot determine (CD) cannot be as rated “++”. - **Good (“+”)** when more than 50% of the Sources of Bias were rated as “+”. - **Fair (“-”)** when 50% or more of the Sources of Bias were rated as “-”. |

## Supplementary File 3c. Quality assessment of included studies using the QUIPS Six Potential Sources of Bias

| **Study** | **Assessment Criteria** | | | | | | | | | | | | | | **Crude Score** | **Source of Bias Rating** | | | | | | | | | | | **Overall Rating** | |
| --- | --- | --- | --- | --- | --- | --- | --- | --- | --- | --- | --- | --- | --- | --- | --- | --- | --- | --- | --- | --- | --- | --- | --- | --- | --- | --- | --- | --- |
| **1** | **2** | **3** | **4** | **5** | **6** | **7** | **8** | **9** | **10** | **11** | **12** | **13** | **14** | **1** | **2** | **3** | | **4** | | | **5** | | **6** | |
| Helgeson, 1991 | Y | Y | Y | Y  (Y/Y) | Y | Y | CD | N | Y | N | Y | NA | Y | N | 9/13 | - | + | + | | + | | | - | | - | | Fair  - | |
| Kerr et al., 2021 | Y | Y | N | Y  (Y/Y) | Y | Y | NA | N | Y | NA | Y | NA | NA | N | 7/10 | + | + | NA | | + | | | - | | - | | Good  + | |
| Kuntsche et al., 2019 | Y | Y | N | Y  (Y/Y) | N | Y | NA | N | Y | NA | Y | NA | NA | Y | 7/10 | + | + | NA | | + | | | + | | - | | Good  + | |
| Lu et al., 2022 | Y | Y | NR | Y  (Y/Y) | N | Y | NA | Y | Y | NA | Y | NA | NA | N | 7/10 | + | + | NA | | + | | | - | | - | | Good  + | |
| McHale et al., 1984 | Y | Y | NR | Y  (Y/NR) | N | Y | CD | N | Y | N | N | NA | Y | N | 5/13 | - | + | + | | + | | | - | | - | | Fair  - | |
| McLaughlin et al., 2010 | Y | Y | NR | Y  (Y/NR) | Y | Y | CD | N | Y | N | Y | NA | Y | N | 7/13 | - | + | + | | + | | | - | | - | | Fair  - | |
| Milner et al., 2018 | Y | Y | Y | Y  (Y/Y) | Y | Y | NA | Y | Y | NA | Y | NA | NA | Y | 10/10 | + | + | NA | | + | | | + | | + | | Excellent  ++ | |
| Po Yee Lo et al., 2019 | Y | Y | N | Y  (Y/Y) | Y | Y | NA | Y | Y | NA | Y | NA | NA | Y | 9/10 | + | + | NA | | + | | | + | | + | | Excellent  ++ | |
| Schopp et al., 2006 | Y | Y | Y | Y  (Y/Y) | N | Y | CD | N | Y | N | Y | NA | NR | N | 7/13 | - | + | - | | + | | | - | | - | | Fair  - | |
| Zeldow et al., 1987 | Y | Y | Y | Y  (Y/Y) | N | Y | CD | Y | Y | N | Y | NA | Y | N | 9/13 | - | + | + | | + | | | - | | - | | Fair  - | |
|  |  |  |  |  |  |  |  |  |  |  |  |  |  |  |  |  |  |  |  | |  |  | |  | |  |  |

*Abbreviations:* **CD**, cannot determine; **N**, no; **NA**, not applicable; **NR**, not reported; **Y**, yes
